# Supplementary material for: Examining Associations between Body Mass Index in 18–25 Year-Olds and Energy Intake from Alcohol: Findings from the Health Survey for England and the Scottish Health Survey
Source: PubMed Central journal article supplement (PMC6213174; doi:10.3390/nu10101477), 2018-10-10
Supplement: nutrients-10-01477-s001.pdf [file nutrients-10-01477-s001.pdf]

## Supplementary material

### **Examining associations between body mass index in 18-25 year-olds and energy intake from alcohol: findings from the Health Survey for England and the Scottish Health Survey**

Viviana Albani<sup>1,2</sup>, Jennifer Bradley<sup>1,2</sup>, Wendy L. Wrieden<sup>1,2,3</sup>, Stephanie Scott<sup>3,4</sup>, Cassey Muir<sup>1,2</sup>, Christine Power<sup>5</sup>, Niamh Fitzgerald<sup>6</sup>, Martine Stead<sup>6</sup>, Eileen Kaner<sup>2,3</sup>, Ashley J. Adamson<sup>1,2,3</sup>

viviana.albani@newcastle.ac.uk; jen.bradley@newcastle.ac.uk; wendy.wrieden@newcastle.ac.uk;  
S.J.Scott@tees.ac.uk; cassey.muir@newcastle.ac.uk; christine.power@ucl.ac.uk;  
niamh.fitzgerald@stir.ac.uk; martine.stead@stir.ac.uk; eileen.kaner@newcastle.ac.uk;  
ashley.adamson@newcastle.ac.uk

<sup>1</sup> Human Nutrition Research Centre, Newcastle University, Newcastle upon Tyne, NE2 4HH, UK

<sup>2</sup> Institute of Health and Society, Newcastle University, Newcastle upon Tyne, NE2 4HH, UK

<sup>3</sup> Fuse—the Centre for Translational Research in Public Health, NE2 4HH, UK

<sup>4</sup> School of Social Sciences, Humanities and Law, Teesside University. Middlesbrough, TS13BA, UK

<sup>5</sup> Population, Policy and Practice, UCL Great Ormond Street Institute of Child Health, 30 Guilford Street, London, WC1N 1EH, UK

<sup>6</sup> Institute for Social Marketing, Institute for Social Marketing, UK Centre for Tobacco and Alcohol Studies, Faculty of Health Sciences and Sport, University of Stirling, Stirling, FK9 4LA, UK

**Table S1 Survey year and sample sizes per year used in analyses**

| Year                                                                            | Health Survey for England | Scottish Health Survey | Total |
|---------------------------------------------------------------------------------|---------------------------|------------------------|-------|
| Including physical activity and fruit and vegetable portions variables          |                           |                        |       |
| 2008                                                                            | 1,433                     | 491                    | 1,924 |
| 2009                                                                            | .                         | 584                    | 584   |
| 2010                                                                            | .                         | 592                    | 592   |
| 2011                                                                            | .                         | 606                    | 606   |
| 2012                                                                            | .                         | 345                    | 345   |
| 2013                                                                            | 604                       | 416                    | 1,020 |
| 2014                                                                            | 565                       | 379                    | 944   |
| Total                                                                           | 2,602                     | 3,413                  | 6,015 |
| Including physical activity but excluding fruit and vegetable portions variable |                           |                        |       |
| 2008                                                                            | 1,434                     | 492                    | 1,926 |
| 2009                                                                            | .                         | 584                    | 584   |
| 2010                                                                            | .                         | 592                    | 592   |
| 2011                                                                            | .                         | 606                    | 606   |
| 2012                                                                            | 769                       | 346                    | 1,115 |
| 2013                                                                            | 604                       | 416                    | 1,020 |
| 2014                                                                            | 565                       | 379                    | 944   |
| Total                                                                           | 3,372                     | 3,415                  | 6,787 |
| Excluding physical activity and including fruit and vegetable portions variable |                           |                        |       |
| 2008                                                                            | 1,439                     | 492                    | 1,931 |
| 2009                                                                            | 437                       | 584                    | 1,021 |
| 2010                                                                            | 737                       | 593                    | 1,330 |
| 2011                                                                            | 758                       | 608                    | 1,366 |
| 2012                                                                            | .                         | 345                    | 345   |
| 2013                                                                            | 736                       | 416                    | 1,152 |
| 2014                                                                            | 667                       | 379                    | 1,046 |
| Total                                                                           | 4,774                     | 3,417                  | 8,191 |

**Table S2. Regression results for BMI and category of intake of energy from total alcoholic beverages (% RDA Energy) on the heaviest drinking day by sex**

|                                | Males       |           |         |                | Females     |           |         |                |
|--------------------------------|-------------|-----------|---------|----------------|-------------|-----------|---------|----------------|
|                                | Coef.       | Std. Err. | p-value | 95% CI         | Coef.       | Std. Err. | p-value | 95% CI         |
| None 0%                        | 0.40        | 0.33      | 0.23    | (-0.25, 1.04)  | 0.49        | 0.32      | 0.126   | (-0.14, 1.12)  |
| Low > 0 to 25%                 | (Reference) |           |         |                | (Reference) |           |         |                |
| Medium > 25% to 50%            | 0.06        | 0.29      | 0.839   | (-0.51, 0.63)  | 0.35        | 0.32      | 0.278   | (-0.28, 0.97)  |
| High > 50% to 75%              | 0.48        | 0.34      | 0.164   | (-0.19, 1.15)  | 1.67        | 0.46      | 0.000   | (0.76, 2.58)   |
| Very High > 75%                | 1.74        | 0.39      | 0.000   | (0.98, 2.49)   | 1.55        | 0.66      | 0.018   | (0.26, 2.85)   |
| No. of drinks                  | -0.04       | 0.10      | 0.708   | (-0.24, 0.16)  | -0.15       | 0.11      | 0.159   | (-0.36, 0.06)  |
| Alcohol frequency              |             |           |         |                |             |           |         |                |
| >=5 times a week               | 0.14        | 0.47      | 0.757   | (-0.77, 1.06)  | -0.68       | 0.82      | 0.411   | (-2.29, 0.94)  |
| 1-4 times a week               | (Reference) |           |         |                | (Reference) |           |         |                |
| 1-2 times a month              | 0.49        | 0.33      | 0.139   | (-0.16, 1.14)  | -0.13       | 0.28      | 0.648   | (-0.67, 0.41)  |
| <1 every couple of months      | -0.07       | 0.43      | 0.864   | (-0.91, 0.77)  | -0.06       | 0.39      | 0.872   | (-0.83, 0.7)   |
| Stopped drinking               | 0.20        | 1.27      | 0.873   | (-2.28, 2.69)  | 1.70        | 1.44      | 0.237   | (-1.12, 4.52)  |
| Never-drunk                    | 1.18        | 0.65      | 0.071   | (-0.1, 2.46)   | -0.13       | 0.63      | 0.831   | (-1.36, 1.09)  |
| Age                            | 0.29        | 0.05      | 0.000   | (0.19, 0.39)   | 0.23        | 0.05      | 0.000   | (0.13, 0.34)   |
| Physical activity              |             |           |         |                |             |           |         |                |
| Low MVPA                       | (Reference) |           |         |                | (Reference) |           |         |                |
| Mid MVPA                       | -0.85       | 0.38      | 0.025   | (-1.59, -0.11) | -0.38       | 0.29      | 0.183   | (-0.95, 0.18)  |
| High MVPA                      | -0.84       | 0.35      | 0.018   | (-1.53, -0.15) | -1.58       | 0.30      | 0.000   | (-2.17, -1)    |
| Employment status              |             |           |         |                |             |           |         |                |
| In employment                  | (Reference) |           |         |                | (Reference) |           |         |                |
| Unemployed*                    | -0.55       | 0.35      | 0.116   | (-1.25, 0.14)  | 0.12        | 0.40      | 0.769   | (-0.66, 0.89)  |
| Other economically inactive    | -0.58       | 0.27      | 0.028   | (-1.1, -0.06)  | -0.64       | 0.24      | 0.009   | (-1.12, -0.16) |
| > 5 FV portions/day            | -0.25       | 0.24      | 0.289   | (-0.72, 0.21)  | -0.16       | 0.28      | 0.568   | (-0.72, 0.39)  |
| Quit smoking in last 12 months | 0.21        | 0.48      | 0.669   | (-0.74, 1.16)  | -0.20       | 0.60      | 0.739   | (-1.37, 0.97)  |
| Limiting longstanding illness  | 0.37        | 0.29      | 0.198   | (-0.19, 0.93)  | 1.06        | 0.28      | 0.000   | (0.51, 1.61)   |

|                                | Males       |           |         |                | Females     |           |         |                |
|--------------------------------|-------------|-----------|---------|----------------|-------------|-----------|---------|----------------|
|                                | Coef.       | Std. Err. | p-value | 95% CI         | Coef.       | Std. Err. | p-value | 95% CI         |
| Ethnicity                      |             |           |         |                |             |           |         |                |
| White and Mixed                | (Reference) |           |         |                | (Reference) |           |         |                |
| Indian, Pakistani, Bangladeshi | -1.64       | 0.58      | 0.005   | (-2.77, -0.51) | -1.49       | 0.67      | 0.027   | (-2.81, -0.16) |
| Other Asian                    | -0.43       | 0.72      | 0.546   | (-1.84, 0.97)  | -4.13       | 0.47      | 0.000   | (-5.04, -3.21) |
| African, Arab and Other        | -1.13       | 0.61      | 0.063   | (-2.32, 0.06)  | 0.44        | 0.66      | 0.506   | (-0.86, 1.74)  |
| Parent                         | 0.40        | 0.39      | 0.307   | (-0.36, 1.16)  | 0.85        | 0.31      | 0.005   | (0.25, 1.46)   |
| Survey year                    |             |           |         |                |             |           |         |                |
| 2008                           | -0.55       | 0.32      | 0.087   | (-1.19, 0.08)  | -0.74       | 0.36      | 0.041   | (-1.44, -0.03) |
| 2009                           | -0.49       | 0.50      | 0.330   | (-1.47, 0.5)   | -0.48       | 0.50      | 0.339   | (-1.45, 0.5)   |
| 2010                           | -0.80       | 0.50      | 0.113   | (-1.79, 0.19)  | -0.26       | 0.57      | 0.651   | (-1.38, 0.87)  |
| 2011                           | -0.52       | 0.49      | 0.283   | (-1.48, 0.43)  | -0.77       | 0.54      | 0.152   | (-1.83, 0.29)  |
| 2012                           | -0.36       | 0.54      | 0.511   | (-1.42, 0.71)  | -1.40       | 0.57      | 0.015   | (-2.52, -0.28) |
| 2013                           | -0.20       | 0.37      | 0.584   | (-0.94, 0.53)  | 0.09        | 0.41      | 0.822   | (-0.7, 0.89)   |
| 2014                           | (Reference) |           |         |                | (Reference) |           |         |                |
| Scotland                       | 0.65        | 0.29      | 0.027   | (0.08, 1.23)   | 1.41        | 0.32      | 0.000   | (0.78, 2.04)   |
| Test of linear trend           | 0.30        | 0.105     | 0.004   | (0.1, 0.51)    | 0.33        | 0.137     | 0.016   | (0.06, 0.6)    |

BMI: body mass index. MVPA: moderate to vigorous physical activity. SD: standard deviation. FV: Fruit and vegetables. Limiting longstanding illness includes mental health and physical conditions affecting vision, hearing, mobility learning and memory, stamina and dexterity (for example, asthma, arthritis, diabetes, cataract, hypertension).

**Fig S1 Relationship of BMI to category of intake of energy from beer intake on heaviest drinking day (% RDA Energy) to energy intake by sex**

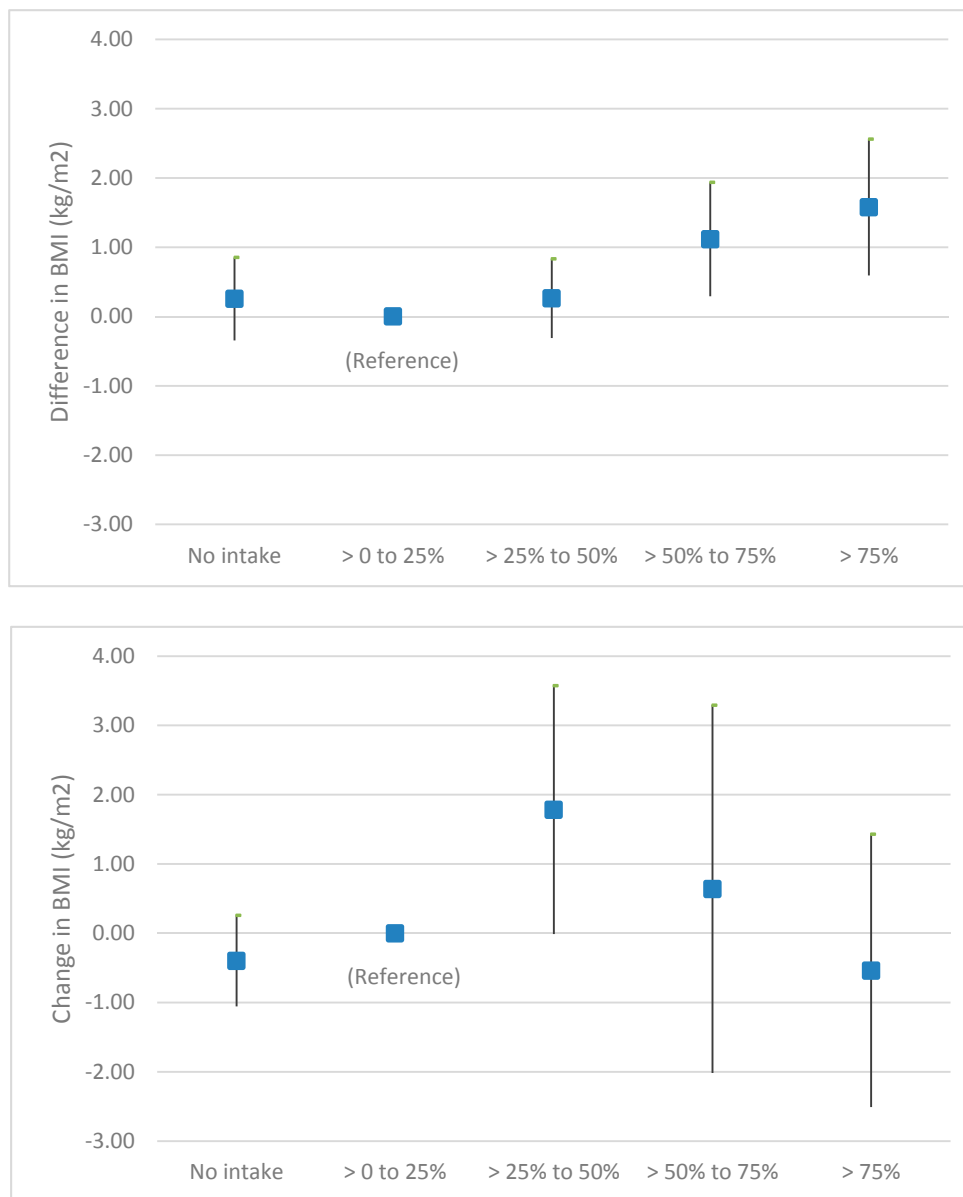

Men (top graph) and women (bottom graph). Vertical bars represent 95% confidence intervals. Estimates of difference in BMI from a linear regression of BMI categories on % RDA Energy from beer intake on the heaviest drinking day. Reference category is > 0 to 25% intake. Alcohol intake measured as the total amount consumed on the heaviest drinking day in the last 7 days. All regressions controlling for age, frequency of intake (number of days had a drink in last 7 days and frequency over the last 12 months), if the individual does not drink alcohol, level of physical activity, employment status, eating more than 5 portions of fruit and vegetables per day, quit smoking in the last year, presence of limiting longstanding illness, ethnicity, being a parent, survey year and survey country.

**Table S3. Regression results for BMI and category of intake of energy from beer intake (%RDA Energy) on heaviest drinking day by sex**

|                                | Males       |           |         |                | Females     |           |         |                |
|--------------------------------|-------------|-----------|---------|----------------|-------------|-----------|---------|----------------|
|                                | Coef.       | Std. Err. | p-value | 95% CI         | Coef.       | Std. Err. | p-value | 95% CI         |
| None 0%                        | 0.25        | 0.31      | 0.41    | -0.34          | -0.40       | 0.34      | 0.236   | (-1.06, 0.26)  |
| Low > 0 to 25%                 | (Reference) |           |         |                | (Reference) |           |         |                |
| Medium > 25% to 50%            | 0.26        | 0.29      | 0.371   | (-0.31, 0.83)  | 1.78        | 0.91      | 0.051   | (-0.01, 3.57)  |
| High > 50% to 75%              | 1.11        | 0.42      | 0.008   | (0.29, 1.94)   | 0.64        | 1.35      | 0.637   | (-2.02, 3.29)  |
| Very High > 75%                | 1.58        | 0.50      | 0.002   | (0.59, 2.56)   | -0.54       | 1.00      | 0.592   | (-2.51, 1.43)  |
| No. of drinks                  | -0.04       | 0.10      | 0.678   | (-0.24, 0.15)  | -0.14       | 0.10      | 0.178   | (-0.33, 0.06)  |
| Alcohol frequency              |             |           |         |                |             |           |         |                |
| >=5 times a week               | 0.18        | 0.46      | 0.691   | (-0.72, 1.09)  | -0.71       | 0.79      | 0.372   | (-2.26, 0.85)  |
| 1-4 times a week               | (Reference) |           |         |                | (Reference) |           |         |                |
| 1-2 times a month              | 0.51        | 0.33      | 0.121   | (-0.13, 1.15)  | -0.15       | 0.28      | 0.593   | (-0.69, 0.4)   |
| <1 every couple of months      | -0.02       | 0.43      | 0.970   | (-0.86, 0.83)  | 0.01        | 0.39      | 0.989   | (-0.76, 0.78)  |
| Stopped drinking               | 0.33        | 1.26      | 0.793   | (-2.14, 2.8)   | 1.88        | 1.51      | 0.214   | (-1.08, 4.84)  |
| Never-drunk                    | 1.30        | 0.65      | 0.046   | (0.02, 2.58)   | 0.02        | 0.63      | 0.973   | (-1.21, 1.26)  |
| Other drinks                   | -0.06       | 0.20      | 0.747   | (-0.45, 0.32)  | -0.18       | 0.20      | 0.370   | (-0.57, 0.21)  |
| Age                            | 0.28        | 0.05      | 0.000   | (0.18, 0.38)   | 0.22        | 0.05      | 0.000   | (0.11, 0.33)   |
| Physical activity              |             |           |         |                |             |           |         |                |
| Low MVPA                       | (Reference) |           |         |                | (Reference) |           |         |                |
| Mid MVPA                       | -0.83       | 0.38      | 0.028   | (-1.57, -0.09) | -0.40       | 0.30      | 0.190   | (-0.99, 0.2)   |
| High MVPA                      | -0.78       | 0.35      | 0.026   | (-1.47, -0.09) | -1.56       | 0.31      | 0.000   | (-2.16, -0.96) |
| Employment status              |             |           |         |                |             |           |         |                |
| In employment                  | (Reference) |           |         |                | (Reference) |           |         |                |
| Unemployed*                    | -0.52       | 0.35      | 0.141   | (-1.21, 0.17)  | 0.15        | 0.39      | 0.697   | (-0.61, 0.92)  |
| Other economically inactive    | -0.59       | 0.27      | 0.028   | (-1.11, -0.06) | -0.67       | 0.25      | 0.009   | (-1.16, -0.17) |
| > 5 FV portions/day            | -0.24       | 0.24      | 0.301   | (-0.7, 0.22)   | -0.19       | 0.29      | 0.513   | (-0.76, 0.38)  |
| Quit smoking in last 12 months | 0.17        | 0.49      | 0.725   | (-0.79, 1.14)  | -0.14       | 0.58      | 0.806   | (-1.28, 1)     |
| Limiting longstanding illness  | 0.38        | 0.29      | 0.186   | (-0.18, 0.95)  | 1.12        | 0.28      | 0.000   | (0.58, 1.66)   |

|                                | Males       |           |         |                | Females     |           |         |                |
|--------------------------------|-------------|-----------|---------|----------------|-------------|-----------|---------|----------------|
|                                | Coef.       | Std. Err. | p-value | 95% CI         | Coef.       | Std. Err. | p-value | 95% CI         |
| Ethnicity                      |             |           |         |                |             |           |         |                |
| White and Mixed                | (Reference) |           |         |                | (Reference) |           |         |                |
| Indian, Pakistani, Bangladeshi | -1.64       | 0.58      | 0.005   | (-2.78, -0.51) | -1.48       | 0.66      | 0.025   | (-2.77, -0.19) |
| Other Asian                    | -0.45       | 0.72      | 0.527   | (-1.85, 0.95)  | -4.15       | 0.47      | 0.000   | (-5.08, -3.23) |
| African, Arab and Other        | -1.13       | 0.61      | 0.062   | (-2.32, 0.06)  | 0.39        | 0.66      | 0.556   | (-0.91, 1.69)  |
| Parent                         | 0.37        | 0.39      | 0.348   | (-0.4, 1.13)   | 0.85        | 0.31      | 0.006   | (0.25, 1.46)   |
| Survey year                    |             |           |         |                |             |           |         |                |
| 2008                           | -0.56       | 0.32      | 0.082   | (-1.2, 0.07)   | -0.63       | 0.36      | 0.079   | (-1.33, 0.07)  |
| 2009                           | -0.48       | 0.50      | 0.342   | (-1.46, 0.5)   | -0.48       | 0.53      | 0.366   | (-1.51, 0.56)  |
| 2010                           | -0.81       | 0.51      | 0.114   | (-1.81, 0.19)  | -0.29       | 0.55      | 0.600   | (-1.37, 0.79)  |
| 2011                           | -0.55       | 0.49      | 0.258   | (-1.51, 0.4)   | -0.78       | 0.53      | 0.142   | (-1.81, 0.26)  |
| 2012                           | -0.37       | 0.55      | 0.492   | (-1.45, 0.7)   | -1.45       | 0.60      | 0.015   | (-2.62, -0.28) |
| 2013                           | -0.25       | 0.37      | 0.506   | (-0.98, 0.48)  | 0.08        | 0.39      | 0.842   | (-0.69, 0.85)  |
| 2014                           | (Reference) |           |         |                | (Reference) |           |         |                |
| Scotland                       | 0.66        | 0.29      | 0.024   | (0.09, 1.23)   | 1.49        | 0.32      | 0.000   | (0.86, 2.12)   |
| Test of linear trend           | 0.27        | 0.105     | 0.012   | (0.06, 0.47)   | 0.49        | 0.202     | 0.016   | (0.09, 0.88)   |

BMI: body mass index. MVPA: moderate to vigorous physical activity. SD: standard deviation. FV: Fruit and vegetables. Limiting longstanding illness includes mental health and physical conditions affecting vision, hearing, mobility learning and memory, stamina and dexterity (for example, asthma, arthritis, diabetes, cataract, hypertension).

**Fig S2 Relationship of BMI to category of intake of energy (%RDA Energy) from wine on heaviest drinking day by sex**

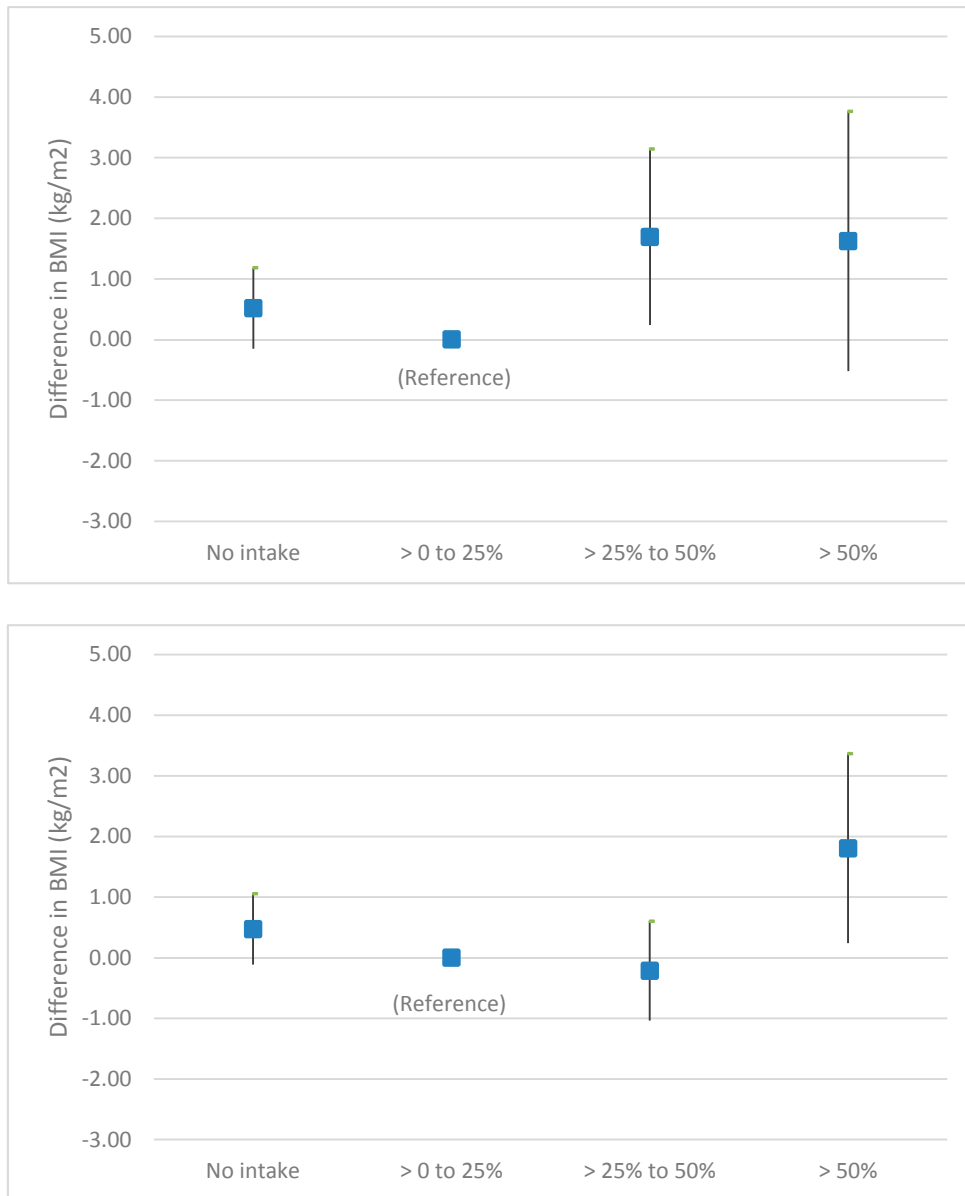

Men (top graph) and women (bottom graph). Vertical bars represent 95% confidence intervals. Estimates of difference in BMI from a linear regression of BMI on categories of % RDA Energy from wine on the heaviest drinking day. Reference category is > 0 to 25% intake. All regressions controlling for age, frequency of intake (number of days had a drink in last 7 days and frequency over the last 12 months), if the individual does not drink alcohol, level of physical activity, employment status, eating more than 5 portions of fruit and vegetables per day, quit smoking in the last year, presence of limiting longstanding illness, ethnicity, being a parent, survey year and survey country.



**Table S4.** Regression results for BMI and category of intake of energy from wine intake (% RDA Energy) on heaviest drinking day by sex

|                                | Males       |           |         |                | Females     |           |         |                |
|--------------------------------|-------------|-----------|---------|----------------|-------------|-----------|---------|----------------|
|                                | Coef.       | Std. Err. | p-value | 95% CI         | Coef.       | Std. Err. | p-value | 95% CI         |
| Alcohol intake (%RDA Energy)   |             |           |         |                |             |           |         |                |
| None 0%                        | 0.52        | 0.34      | 0.130   | (-0.15, 1.18)  | 0.47        | 0.30      | 0.115   | (-0.11, 1.05)  |
| Low > 0 to 25%                 | (Reference) |           |         |                | (Reference) |           |         |                |
| Medium > 25% to 50%            | 1.69        | 0.74      | 0.022   | (0.24, 3.14)   | -0.22       | 0.42      | 0.601   | (-1.04, 0.6)   |
| High/Very High > 50%           | 1.62        | 1.09      | 0.138   | (-0.52, 3.76)  | 1.80        | 0.80      | 0.024   | (0.24, 3.37)   |
| No. of drinks                  | -0.03       | 0.10      | 0.767   | (-0.22, 0.16)  | -0.15       | 0.10      | 0.129   | (-0.34, 0.04)  |
| Alcohol frequency              |             |           |         |                |             |           |         |                |
| >=5 times a week               | 0.21        | 0.46      | 0.655   | (-0.7, 1.12)   | -0.54       | 0.82      | 0.513   | (-2.14, 1.07)  |
| 1-4 times a week               | (Reference) |           |         |                | (Reference) |           |         |                |
| 1-2 times a month              | 0.47        | 0.33      | 0.159   | (-0.18, 1.12)  | -0.17       | 0.28      | 0.548   | (-0.71, 0.38)  |
| <1 every couple of months      | -0.05       | 0.43      | 0.902   | (-0.9, 0.79)   | -0.01       | 0.39      | 0.987   | (-0.77, 0.76)  |
| Stopped drinking               | 0.33        | 1.26      | 0.795   | (-2.14, 2.8)   | 1.85        | 1.51      | 0.222   | (-1.12, 4.81)  |
| Never-drunk                    | 1.35        | 0.65      | 0.038   | (0.08, 2.62)   | 0.00        | 0.63      | 0.994   | (-1.23, 1.24)  |
| Other drinks                   | 0.03        | 0.18      | 0.891   | (-0.33, 0.38)  | 0.32        | 0.20      | 0.111   | (-0.07, 0.72)  |
| Age                            | 0.28        | 0.05      | 0.000   | (0.18, 0.38)   | 0.24        | 0.05      | 0.000   | (0.13, 0.35)   |
| Physical activity              |             |           |         |                |             |           |         |                |
| Low MVPA                       | (Reference) |           |         |                | (Reference) |           |         |                |
| Mid MVPA                       | -0.82       | 0.38      | 0.032   | (-1.56, -0.07) | -0.39       | 0.30      | 0.196   | (-0.98, 0.2)   |
| High MVPA                      | -0.76       | 0.35      | 0.031   | (-1.45, -0.07) | -1.58       | 0.31      | 0.000   | (-2.18, -0.98) |
| Employment status              |             |           |         |                |             |           |         |                |
| In employment                  | (Reference) |           |         |                | (Reference) |           |         |                |
| Unemployed*                    | -0.54       | 0.36      | 0.129   | (-1.24, 0.16)  | 0.21        | 0.39      | 0.592   | (-0.55, 0.97)  |
| Other economically inactive    | -0.64       | 0.27      | 0.017   | (-1.16, -0.11) | -0.64       | 0.25      | 0.012   | (-1.14, -0.14) |
| > 5 FV portions/day            | -0.28       | 0.24      | 0.232   | (-0.75, 0.18)  | -0.17       | 0.29      | 0.554   | (-0.74, 0.39)  |
| Quit smoking in last 12 months | 0.14        | 0.49      | 0.776   | (-0.82, 1.1)   | -0.21       | 0.58      | 0.709   | (-1.34, 0.91)  |

|                                | Males       |           |         |                | Females     |           |         |                |
|--------------------------------|-------------|-----------|---------|----------------|-------------|-----------|---------|----------------|
|                                | Coef.       | Std. Err. | p-value | 95% CI         | Coef.       | Std. Err. | p-value | 95% CI         |
| Limiting longstanding illness  | 0.41        | 0.29      | 0.152   | (-0.15, 0.98)  | 1.10        | 0.28      | 0.000   | (0.56, 1.64)   |
| Ethnicity                      |             |           |         |                |             |           |         |                |
| White and Mixed                | (Reference) |           |         |                | (Reference) |           |         |                |
| Indian, Pakistani, Bangladeshi | -1.72       | 0.58      | 0.003   | (-2.86, -0.58) | -1.49       | 0.66      | 0.023   | (-2.78, -0.2)  |
| Other Asian                    | -0.57       | 0.70      | 0.420   | (-1.95, 0.81)  | -4.16       | 0.47      | 0.000   | (-5.08, -3.25) |
| African, Arab and Other        | -1.14       | 0.60      | 0.058   | (-2.32, 0.04)  | 0.38        | 0.66      | 0.566   | (-0.92, 1.68)  |
| Parent                         | 0.41        | 0.39      | 0.294   | (-0.35, 1.17)  | 0.86        | 0.31      | 0.006   | (0.25, 1.47)   |
| Survey year                    |             |           |         |                |             |           |         |                |
| 2008                           | -0.45       | 0.32      | 0.166   | (-1.08, 0.18)  | -0.67       | 0.36      | 0.065   | (-1.37, 0.04)  |
| 2009                           | -0.37       | 0.51      | 0.466   | (-1.36, 0.62)  | -0.55       | 0.53      | 0.297   | (-1.59, 0.49)  |
| 2010                           | -0.62       | 0.51      | 0.223   | (-1.63, 0.38)  | -0.33       | 0.55      | 0.547   | (-1.4, 0.74)   |
| 2011                           | -0.45       | 0.49      | 0.361   | (-1.41, 0.51)  | -0.85       | 0.53      | 0.109   | (-1.88, 0.19)  |
| 2012                           | -0.24       | 0.55      | 0.658   | (-1.31, 0.83)  | -1.41       | 0.60      | 0.018   | (-2.58, -0.24) |
| 2013                           | -0.19       | 0.37      | 0.609   | (-0.92, 0.54)  | 0.08        | 0.39      | 0.843   | (-0.69, 0.84)  |
| 2014                           | (Reference) |           |         |                | (Reference) |           |         |                |
| Scotland                       | 0.58        | 0.29      | 0.049   | (0, 1.16)      | 1.43        | 0.33      | 0.000   | (0.79, 2.07)   |
| Test of linear trend           | 0.19        | 0.226     | 0.392   | (-0.25, 0.64)  | -0.12       | 0.156     | 0.440   | (-0.43, 0.19)  |

BMI: body mass index. MVPA: moderate to vigorous physical activity. SD: standard deviation. FV: Fruit and vegetables. Limiting longstanding illness includes mental health and physical conditions affecting vision, hearing, mobility learning and memory, stamina and dexterity (for example, asthma, arthritis, diabetes, cataract, hypertension).

**Fig S3. Relationship of BMI to category of intake of energy from spirits and RTDs on heaviest drinking day (% RDA Energy) by sex.**

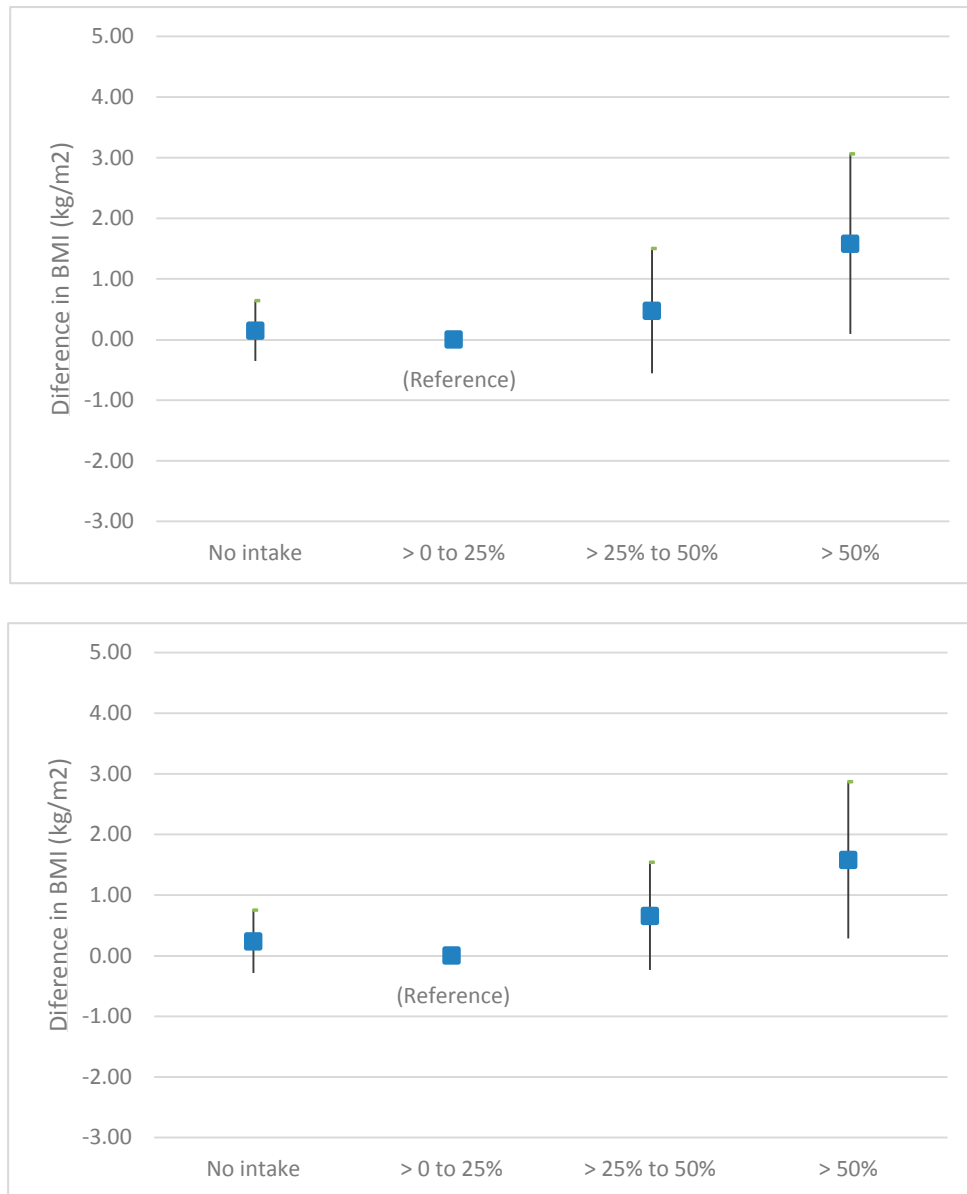

Men (top graph) and women (bottom graph). Vertical bars represent 95% confidence intervals. Estimates of difference in BMI from a linear regression of BMI on categories of % RDA Energy from spirits and RTDs intake on the heaviest drinking day. Reference category is > 0 to 25% intake. All regressions controlling for age, frequency of intake (number of days had a drink in last 7 days and frequency over the last 12 months), if the individual does not drink alcohol, level of physical activity, employment status, eating more than 5 portions of fruit and vegetables per day, quit smoking in the last year, presence of limiting longstanding illness, ethnicity, being a parent, survey year and survey country.

**Table S5. Regression results for BMI and category of intake of energy from spirits and RTDs intake (% energy RDA) on heaviest drinking day by sex**

|                                | Males       |           |         |                | Females     |           |         |                |
|--------------------------------|-------------|-----------|---------|----------------|-------------|-----------|---------|----------------|
|                                | Coef.       | Std. Err. | p-value | 95% CI         | Coef.       | Std. Err. | p-value | 95% CI         |
| Alcohol intake (% RDA Energy)  | 0.14        | 0.25      | 0.572   | (-0.35, 0.64)  | 0.23        | 0.26      | 0.377   | (-0.28, 0.75)  |
| None 0%                        | (Reference) |           |         |                | (Reference) |           |         |                |
| Low > 0 to 25%                 | 0.47        | 0.53      | 0.370   | (-0.56, 1.5)   |             |           |         |                |
| Medium > 25% to 50%            | 1.58        | 0.76      | 0.037   | (0.09, 3.06)   | 0.65        | 0.45      | 0.150   | (-0.24, 1.54)  |
| High/Very High > 50%           | 0.14        | 0.25      | 0.572   | (-0.35, 0.64)  | 1.58        | 0.66      | 0.017   | (0.29, 2.87)   |
| No. of drinks                  | -0.03       | 0.10      | 0.776   | (-0.22, 0.17)  | -0.15       | 0.10      | 0.124   | (-0.35, 0.04)  |
| Alcohol frequency              |             |           |         |                |             |           |         |                |
| >=5 times a week               | 0.22        | 0.46      | 0.637   | (-0.69, 1.12)  | -0.50       | 0.80      | 0.531   | (-2.06, 1.06)  |
| 1-4 times a week               | (Reference) |           |         |                | (Reference) |           |         |                |
| 1-2 times a month              | 0.45        | 0.33      | 0.175   | (-0.2, 1.09)   | -0.11       | 0.28      | 0.699   | (-0.65, 0.44)  |
| <1 every couple of months      | -0.05       | 0.43      | 0.910   | (-0.89, 0.79)  | 0.05        | 0.39      | 0.903   | (-0.72, 0.81)  |
| Stopped drinking               | 0.32        | 1.26      | 0.800   | (-2.15, 2.79)  | 1.94        | 1.51      | 0.199   | (-1.02, 4.9)   |
| Never-drank                    | 1.32        | 0.65      | 0.042   | (0.05, 2.6)    | 0.07        | 0.63      | 0.908   | (-1.17, 1.31)  |
| Other drinks                   | 0.02        | 0.23      | 0.932   | (-0.44, 0.48)  | 0.12        | 0.22      | 0.576   | (-0.31, 0.55)  |
| Age                            | 0.29        | 0.05      | 0.000   | (0.19, 0.39)   | 0.23        | 0.06      | 0.000   | (0.12, 0.34)   |
| Physical activity              |             |           |         |                |             |           |         |                |
| Low MVPA                       | (Reference) |           |         |                | (Reference) |           |         |                |
| Mid MVPA                       | -0.83       | 0.38      | 0.028   | (-1.57, -0.09) | -0.40       | 0.30      | 0.186   | (-1, 0.19)     |
| High MVPA                      | -0.79       | 0.35      | 0.025   | (-1.49, -0.1)  | -1.57       | 0.31      | 0.000   | (-2.17, -0.97) |
| Employment status              |             |           |         |                |             |           |         |                |
| In employment                  | (Reference) |           |         |                | (Reference) |           |         |                |
| Unemployed*                    | -0.52       | 0.36      | 0.143   | (-1.22, 0.18)  | 0.15        | 0.39      | 0.699   | (-0.62, 0.92)  |
| Other economically inactive    | -0.61       | 0.26      | 0.021   | (-1.13, -0.09) | -0.63       | 0.26      | 0.014   | (-1.13, -0.13) |
| > 5 FV portions/day            | -0.30       | 0.24      | 0.203   | (-0.77, 0.16)  | -0.18       | 0.29      | 0.518   | (-0.75, 0.38)  |
| Quit smoking in last 12 months | 0.20        | 0.50      | 0.685   | (-0.77, 1.17)  | -0.10       | 0.57      | 0.858   | (-1.21, 1.01)  |

|                                | Males       |           |         |                | Females     |           |         |                |
|--------------------------------|-------------|-----------|---------|----------------|-------------|-----------|---------|----------------|
|                                | Coef.       | Std. Err. | p-value | 95% CI         | Coef.       | Std. Err. | p-value | 95% CI         |
| Limiting longstanding illness  | 0.42        | 0.29      | 0.150   | (-0.15, 0.99)  | 1.07        | 0.28      | 0.000   | (0.53, 1.61)   |
| Ethnicity                      |             |           |         |                |             |           |         |                |
| White and Mixed                | (Reference) |           |         |                | (Reference) |           |         |                |
| Indian, Pakistani, Bangladeshi | -1.67       | 0.58      | 0.004   | (-2.81, -0.53) | -1.51       | 0.66      | 0.023   | (-2.8, -0.21)  |
| Other Asian                    | -0.48       | 0.72      | 0.500   | (-1.89, 0.92)  | -4.16       | 0.47      | 0.000   | (-5.08, -3.23) |
| African, Arab and Other        | -1.13       | 0.61      | 0.062   | (-2.32, 0.06)  | 0.42        | 0.67      | 0.528   | (-0.89, 1.73)  |
| Parent                         | 0.42        | 0.39      | 0.283   | (-0.35, 1.19)  | 0.82        | 0.31      | 0.009   | (0.21, 1.44)   |
| Survey year                    |             |           |         |                |             |           |         |                |
| 2008                           | -0.53       | 0.32      | 0.104   | (-1.16, 0.11)  | -0.71       | 0.36      | 0.049   | (-1.42, 0)     |
| 2009                           | -0.47       | 0.50      | 0.353   | (-1.46, 0.52)  | -0.50       | 0.53      | 0.345   | (-1.54, 0.54)  |
| 2010                           | -0.77       | 0.50      | 0.119   | (-1.75, 0.2)   | -0.25       | 0.55      | 0.645   | (-1.32, 0.82)  |
| 2011                           | -0.54       | 0.49      | 0.270   | (-1.5, 0.42)   | -0.77       | 0.53      | 0.149   | (-1.81, 0.27)  |
| 2012                           | -0.32       | 0.55      | 0.558   | (-1.39, 0.75)  | -1.37       | 0.60      | 0.021   | (-2.54, -0.2)  |
| 2013                           | -0.24       | 0.37      | 0.512   | (-0.97, 0.48)  | 0.09        | 0.39      | 0.825   | (-0.68, 0.85)  |
| 2014                           | (Reference) |           |         |                | (Reference) |           |         |                |
| Scotland                       | 0.63        | 0.29      | 0.030   | (0.06, 1.21)   | 1.42        | 0.33      | 0.000   | (0.78, 2.06)   |
| Test of linear trend           | 0.18        | 0.170     | 0.286   | (-0.15, 0.52)  | 0.28        | 0.161     | 0.084   | (-0.04, 0.59)  |
